# Supplementary material
Source: PubMed Central journal article supplement (PMC4476452)
Supplement: supp_ddv147_ddv147supp.pdf [file supp_ddv147_ddv147supp.pdf]

## Supplementary Material

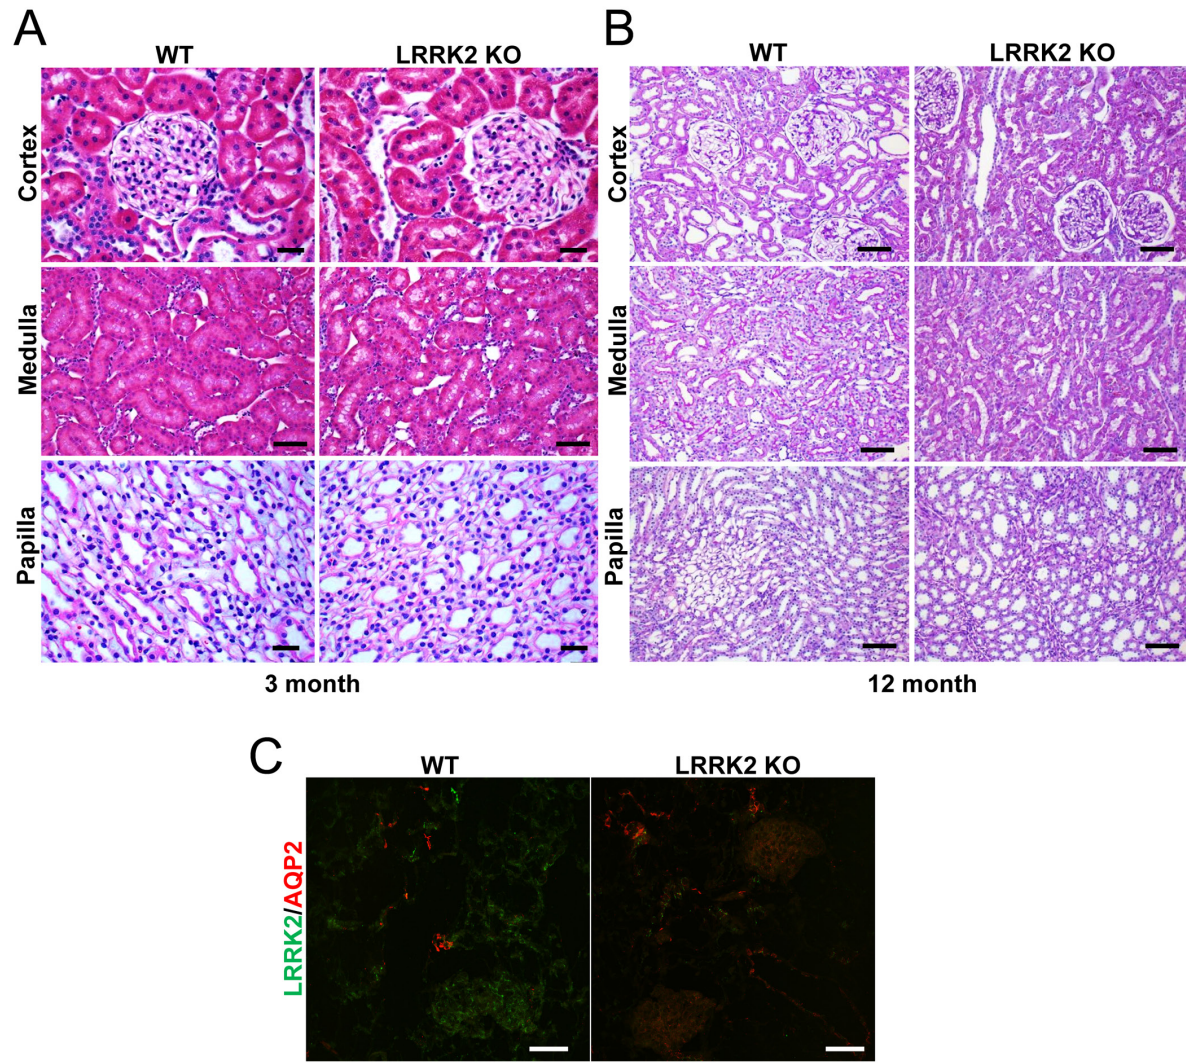

**Supplementary Figure S1.** Normal kidney anatomy in *LRRK2* KO rats. A) Hematoxylin and eosin (H&E) staining of 3 month WT and *LRRK2* KO kidneys sections are shown. No morphological abnormalities or other evidence of kidney disease is apparent. Scale bar represents 20  $\mu\text{m}$  for the top and bottom panels and 50  $\mu\text{m}$  for the middle panels. B) Representative images of periodic acid-Schiff (PAS) staining of 12 month WT and *LRRK2* KO kidneys sections are shown. While it was not quantified, it is noteworthy that the PAS stain in the *LRRK2* KO renal tubules of the cortex and medulla is of greater intensity than in the WT kidneys, which may reflect the PAS detection of glycoproteins and glycolipids. Scale bar represents 50 $\mu\text{m}$ . C) Confocal images of immunofluorescence staining of LRRK2 (green color) and Aquaporin-2, AQP2 (red color), from 5  $\mu\text{m}$  thick cryosections of cortex from 3-month old WT rat kidneys are shown. Scale bar represents 50 $\mu\text{m}$ .

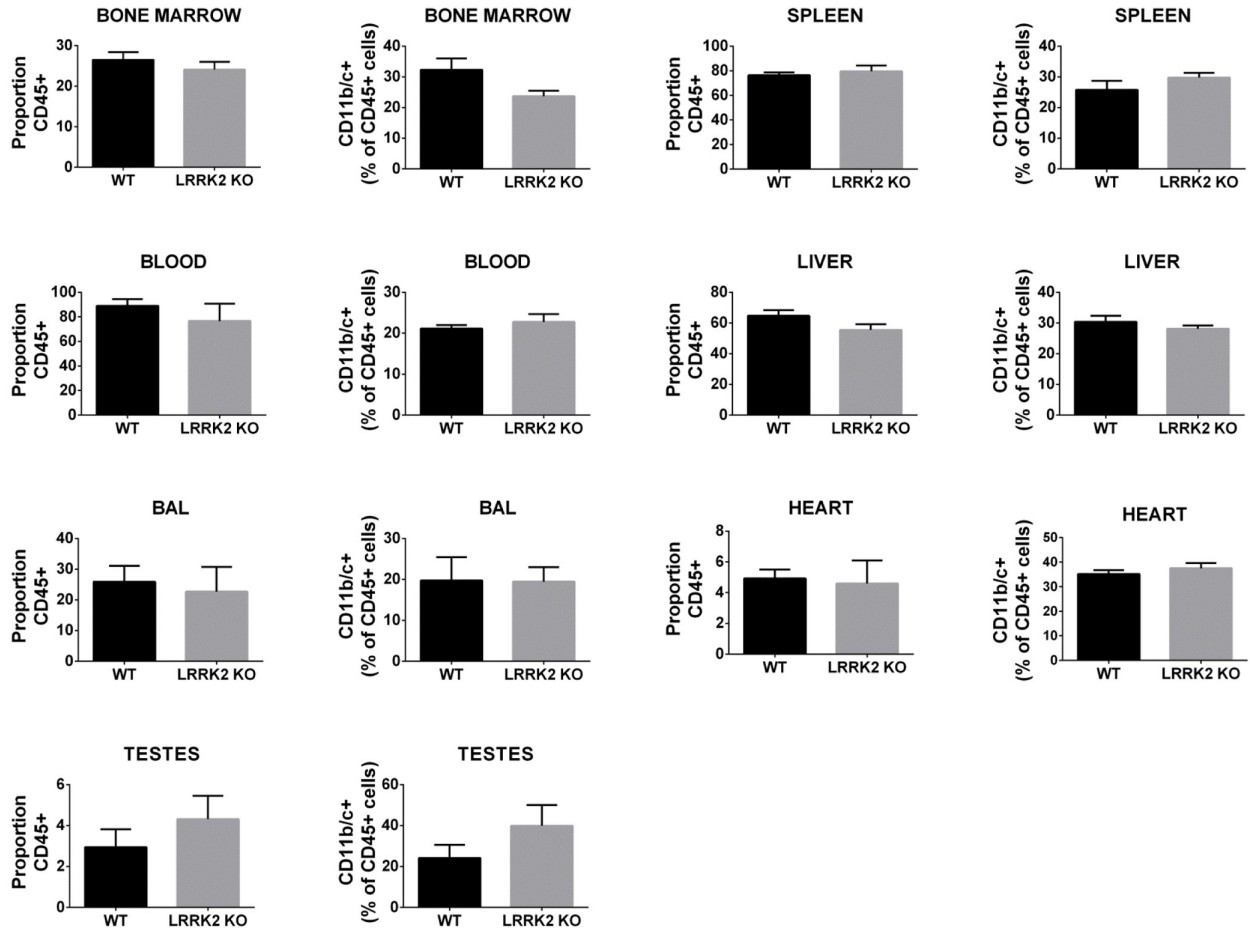

**Supplementary Figure S2.** Comparison of CD45<sup>+</sup> CD11b/c<sup>+</sup> cells in the indicated organs or tissues of WT and *LRRK2* KO rats. Bar graphs depict results of flow cytometry experiments wherein single cell suspensions from the indicated organ or tissue were stained with CD45 and CD11b/c to quantify intra-organ macrophages (CD45<sup>+</sup> CD11b/c<sup>+</sup>). Cells were obtained from the organs of 4 WT and 5 *LRRK2* KO rats. % of CD45<sup>+</sup> cells denotes overall proportions of 7-AAD negative/CD45<sup>+</sup> cells, % of CD11b/c<sup>+</sup> cells denotes the proportion of CD45<sup>+</sup> cells that express CD11b/c. BAL- Broncho-alveolar lavage.

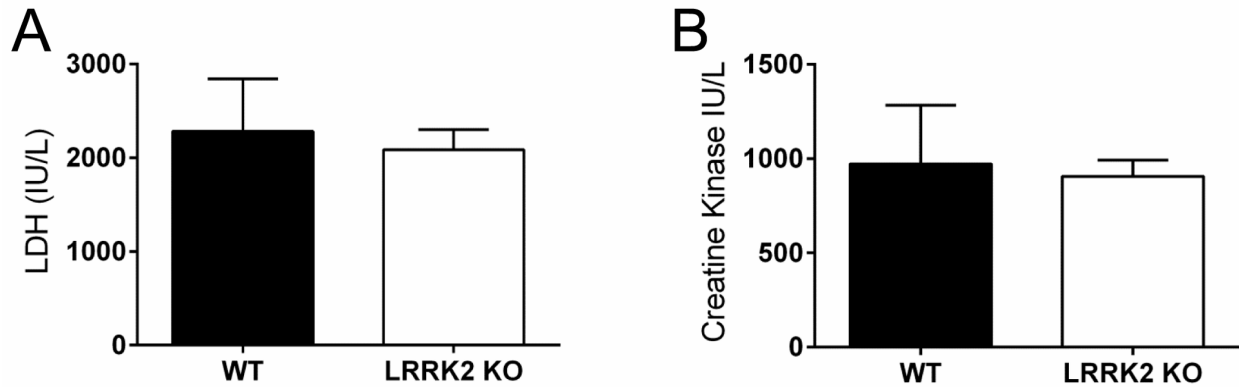

**Supplementary Figure S3.** Measures of muscle injury 24 hours after glycerol injection. A) Levels of serum lactate dehydrogenase (IU/L- international units/liter) at 24 hours after glycerol injection in WT and LRRK2 KO animals, indicating the same degree of muscle injury in both groups. B) Levels of creatine kinase (IU/L) at 24 hours after glycerol injection in WT and LRRK2 KO animals, indicating the same degree of muscle injury in both groups. Levels are represented as mean  $\pm$  S.E.M from N=3 WT rats and N=5 LRRK2 KO rats.

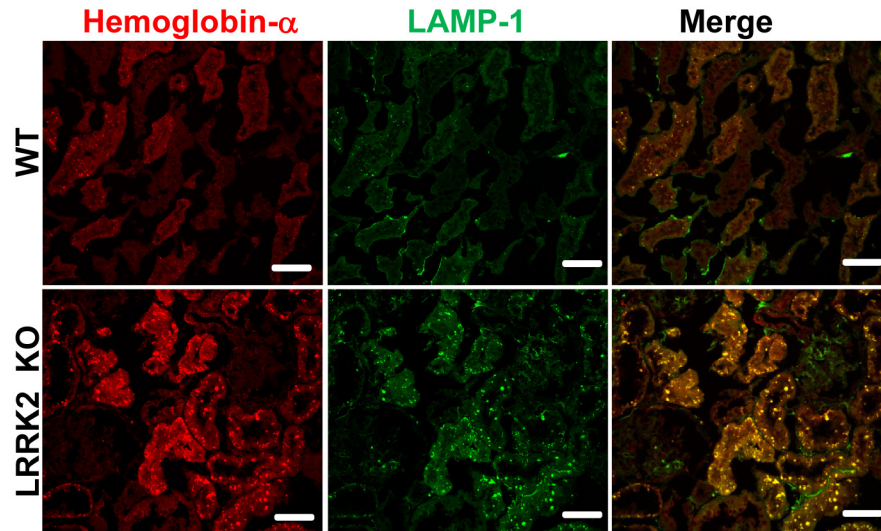

**Supplementary Figure S4.** Accumulation of hemoglobin- $\alpha$  in the cortex of *LRRK2* KO rat kidneys. *LRRK2* KO kidneys have increased hemoglobin- $\alpha$  staining specifically in the renal tubules that colocalize with lysosome associated membrane protein 1 (LAMP-1) stained structures. Confocal images of immunofluorescence staining of hemoglobin- $\alpha$  (red) and LAMP-1 (LAMP-1; green) in cortex from 3-month WT and *LRRK2* KO rat kidneys are shown. Scale bar is 50  $\mu$ m.

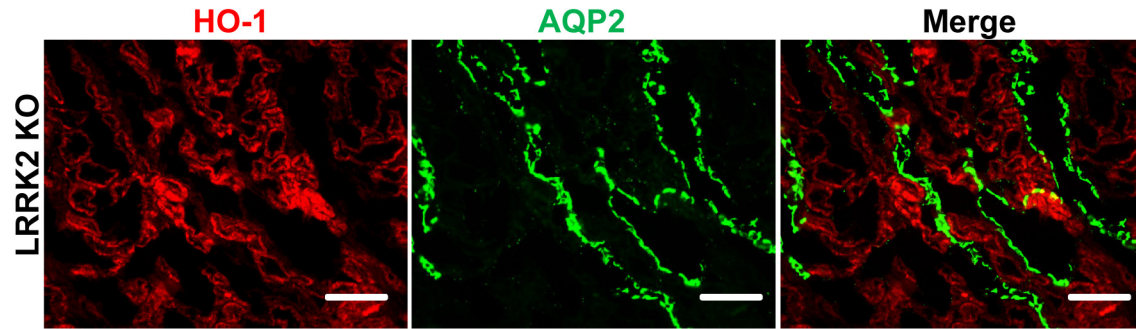

**Supplementary Figure S5.** HO-1 staining does not colocalize with the AQP2 staining. Representative images of immunofluorescence staining of HO-1 (red) and aquaporin-2 (AQP2, green) from 5  $\mu$ m thick cryosections of outer medulla from 3 month WT and *LRKR2* KO rats. The HO-1 staining did not colocalize with the AQP2 staining thus excluding the colocalization with the collecting ducts. Scale bar indicates 200  $\mu$ m.



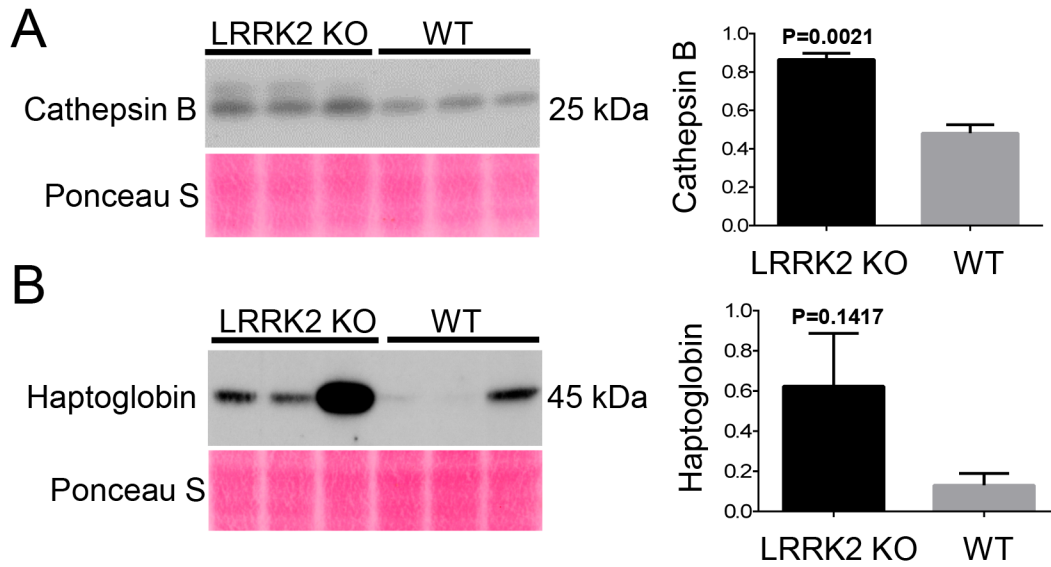

**Supplementary Figure S6.** Confirmation of upregulated proteins in *LRRK2* KO kidneys. Western blots and corresponding densitometry analyses (normalized to Ponceau S) of total kidney protein lysates from 12 month old WT and *LRRK2* KO kidneys using A) anti-Cathepsin-B and B) anti-Haptoglobin antibodies are shown. Ponceau S is shown for loading. Graphs are represented as mean  $\pm$  S.E.M from N=3 WT rats and N=3 *LRRK2* KO rats.

**Supplementary Table S1.** Intensities of identified peaks (m/z) from LRRK2 KO lipid extract.

| LRRK2 KO Lipid extract |                  |            |                  |
|------------------------|------------------|------------|------------------|
| <u>m/z</u>             | <u>Intensity</u> | <u>m/z</u> | <u>Intensity</u> |
| 1278.0                 | 298.01           | 1564.2     | 1480.72          |
| 1302.0                 | 209.99           | 1567.2     | 1180.4           |
| 1304.0                 | 238.65           | 1569.3     | 1502.03          |
| 1306.0                 | 216.16           | 1571.2     | 1046.7           |
| 1326.0                 | 342.33           | 1572.3     | 456.31           |
| 1354.0                 | 244.06           | 1575.3     | 338.83           |
| 1463.2                 | 194              | 1589.3     | 630.15           |
| 1485.2                 | 348.21           | 1592.3     | 2066.09          |
| 1492.2                 | 369.32           | 1594.3     | 722.66           |
| 1494.2                 | 450.2            | 1596.3     | 757.25           |
| 1513.2                 | 429.2            | 1598.3     | 608.42           |
| 1516.2                 | 1209.58          | 1617.3     | 436.03           |
| 1518.3                 | 654.01           | 1620.3     | 764.83           |
| 1519.3                 | 362.06           | 1623.4     | 295.02           |
| 1521.3                 | 430.98           | 1625.4     | 298.63           |
| 1540.2                 | 1050.48          | 1724.3     | 253.22           |
| 1542.2                 | 1619.22          | 1751.2     | 269.17           |
| 1544.3                 | 1307.73          | 1772.3     | 307.19           |
| 1547.3                 | 467.09           | 1800.3     | 340.46           |
| 1549.3                 | 317.14           |            |                  |
